# Supplementary material for: An Exploratory Study on Seasonal Variation in the Gut Microbiota of Athletes: Insights from Japanese Handball Players
Source: MDPI journal article supplement (doi:10.3390/microorganisms12040781), 2024-04-11
Supplement: s1 [file s1]

## Supplementary Materials

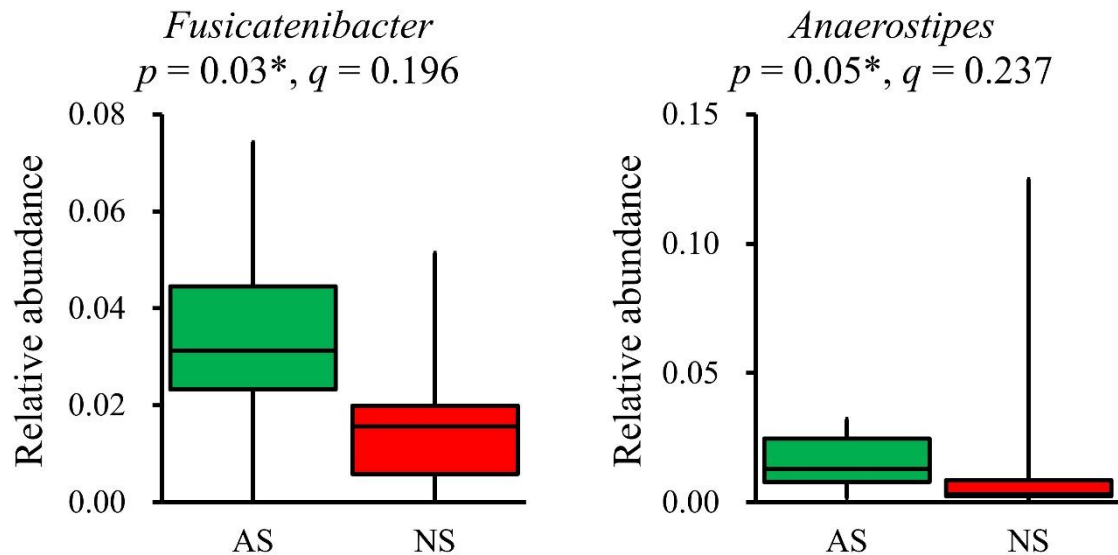

### **Supplemental Figure S1. *Fusicatenibacter* and *Anaerostipes* showed a tendency to differ between AS and NS in dataset 1**

Among 19 dominant genera (>1%), *Fusicatenibacter* and *Anaerostipes* showed a tendency to differ between AS ( $n=17$ , green) and NS ( $n=10$ , red), as presented by box plots. Box plots show the median, as well as the lower and upper quartiles. Whiskers represent the minimum and maximum spread. Statistical analysis was performed using the Mann–Whitney U test and the Benjamini–Hochberg procedure. *Faecalibacterium* and *Streptococcus*, which were significantly different ( $p<0.05$  and  $q<0.05$ ), are presented in Figure 3. Abbreviations: Athletic subjects (AS); Non-athletic subjects (NS).

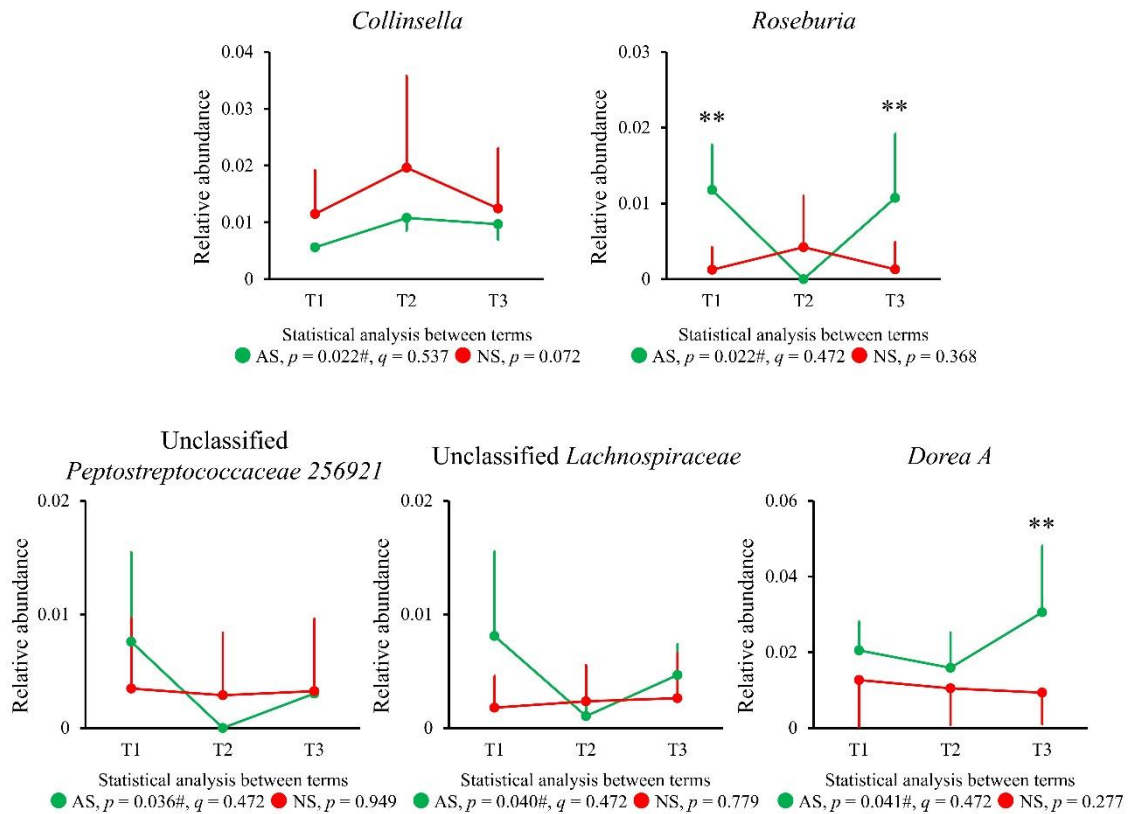

## Supplemental Figure S2. Genera showed a tendency to differ between terms in dataset 2

We attempted to search for genera with significant changes between the athletic seasons and the off-season. Although none of the detected genera indicated significant longitudinal changes, *Collinsella*, *Roseburia*, unclassified *Peptostreptococcaceae* 256921, unclassified *Lachnospiraceae*, and *Dorea A* tended to change ( $p < 0.05$  and  $q > 0.05$ ). The  $p$ -values were assessed using the Mann–Whitney U test and the Friedman test for comparisons between groups ( $**p < 0.01$ ) and between terms ( $\#p < 0.05$ ), respectively. The  $q$ -values were analyzed using the Benjamini–Hochberg procedure. The data are expressed as the mean and standard deviation. Abbreviations: AS, Athletic subjects; NS, Non-athletic subjects; T1, term 1 (athletic season); T2, term 2 (off-season); T3, term 3 (athletic season).

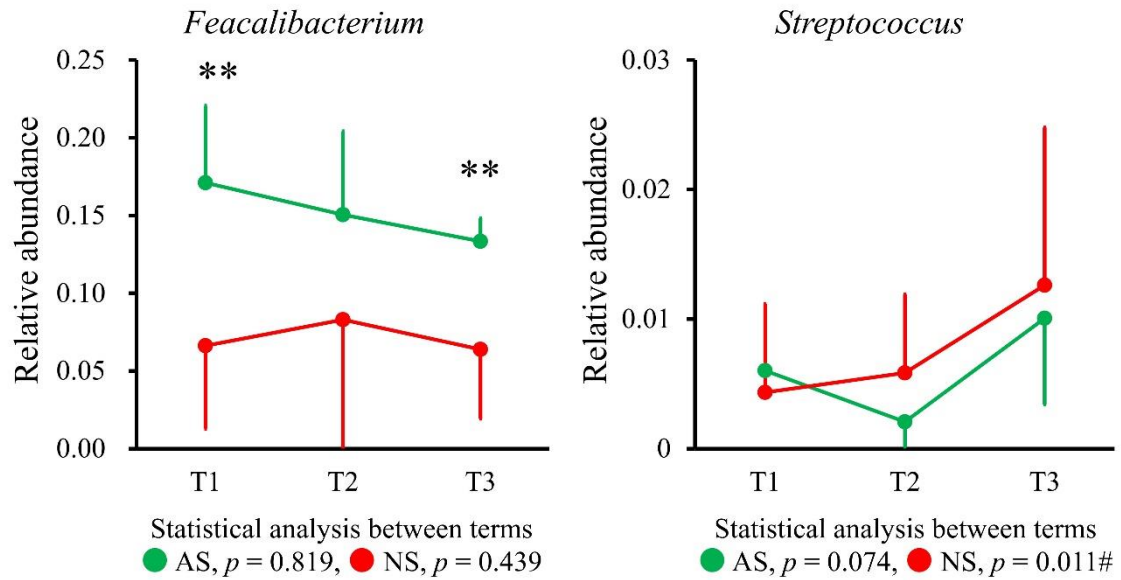

**Supplemental Figure S3. Longitudinal analysis of the relative abundance of *Faecalibacterium* and *Streptococcus* between terms in dataset 2**

*Faecalibacterium* and *Streptococcus*, which showed a significant difference in abundance in dataset 1 (Figure 3), are presented by the mean and standard deviation. The  $p$ -values were assessed using the Mann–Whitney U test and the Friedman test for comparisons between groups (\*\* $p < 0.01$ ) and between terms ( $\#p < 0.05$ ), respectively. Abbreviations: AS, Athletic subjects; NS, Non-athletic subjects; T1, term 1 (athletic season); T2, term 2 (off-season); T3, term 3 (athletic season).

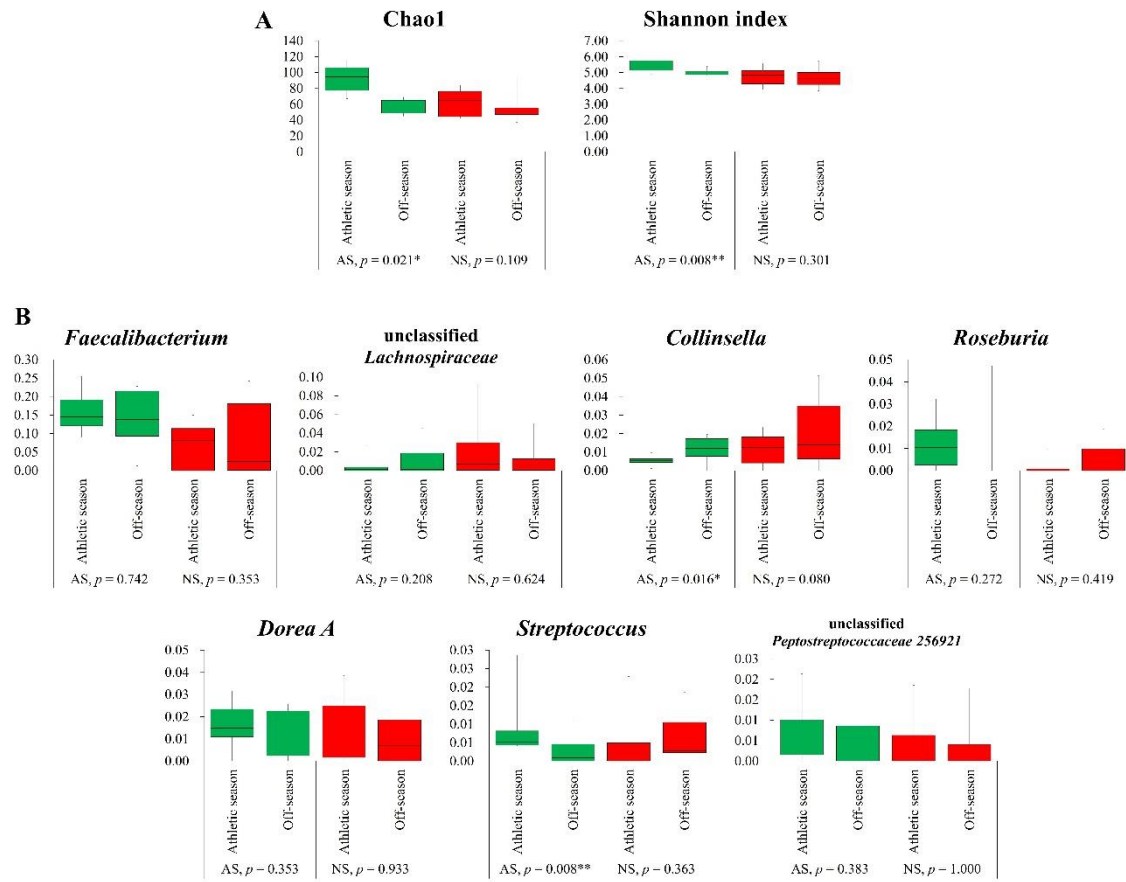

### Supplemental Figure S4. Alpha-diversity and the noted genus compared between the athletic season and the off-season.

To revalidate the results obtained from the analysis using Dataset2 by increasing the sample size, we conducted an analysis using samples collected during two periods: T1 (the athletic season) and T2 (the off-season). The samples used for the analysis consisted of AS; Nimo5002, Nimo5004, Nimo5005, Nimo5011, Nimo5012, Nimo5016, Nimo5018, Nimo5022 ( $n=8$ ) and NS; Nimo5009, Nimo5017, Nimo5023, Nimo5027, Nimo5029, Nimo5031, Nimo5032, Nimo5034, Nimo5035 ( $n=9$ ). The results regarding (A) alpha-diversity and (B) bacterial genera, as also analyzed in Figure 4, Supplemental Figure S2 and S3, are presented using box plots. The box plots display the median, lower and upper quartiles, while the whiskers represent the minimum and maximum spread. Statistical analysis was performed using the paired  $t$ -test ( $*p<0.05$ ,  $**p<0.01$ ). Abbreviations: AS, Athletic subjects; NS, Non-athletic subjects; T1, term 1 (athletic season); T2, term 2 (off-season); T3, term 3 (athletic season).

Supplemental Table S1. Detailed background information for subjects

| Time of stool sampling |    |                                 |           |           |             |             |             |          |      |             |                  |             |                                                         | Background information |  |  |  |
|------------------------|----|---------------------------------|-----------|-----------|-------------|-------------|-------------|----------|------|-------------|------------------|-------------|---------------------------------------------------------|------------------------|--|--|--|
| ID                     |    | Group                           | Dataset 1 | Dataset 2 | Term 1 (T1) | Term 2 (T2) | Term 3 (T3) | Age      | Sex  | Height (cm) | Body weight (kg) | BMI (kg/m²) | Active time per day (e.g. sports and/or physical labor) | Sedentary time per day |  |  |  |
| Nimo5001               | AS | Handball player                 | ○         |           | Feb-22      |             |             | Twenties | Male | 182         | 98               | 29.6        | 30 min - 3 hours                                        | 3-8 hours              |  |  |  |
| Nimo5002               | AS | Handball player                 | ○         | ○         | Nov-21      | Apr-22      | Oct-22      | Thirties | Male | 186         | 86               | 24.9        | 3 hours or more                                         | 3-8 hours              |  |  |  |
| Nimo5003               | AS | Handball player                 | ○         |           | Nov-21      |             |             | Twenties | Male | 170         | 74               | 25.6        | 30 min - 3 hours                                        | 3-8 hours              |  |  |  |
| Nimo5004               | AS | Handball player                 | ○         | ○         | Jan-22      | Jun-22      | Jul-22      | Twenties | Male | 190         | 100              | 27.7        | 3 hours or more                                         | 3-8 hours              |  |  |  |
| Nimo5005               | AS | Handball player                 | ○         | ○         | Feb-22      | Apr-22      | Aug-22      | Twenties | Male | 190         | 90               | 24.9        | 30 min - 3 hours                                        | 3-8 hours              |  |  |  |
| Nimo5006               | AS | Handball player                 | ○         |           | Nov-21      |             |             | Twenties | Male | 170         | 70               | 24.2        | 30 min - 3 hours                                        | 3-8 hours              |  |  |  |
| Nimo5007               | AS | Handball player                 | ○         |           | Nov-21      |             |             | Twenties | Male | 186         | 92               | 26.6        | 3 hours or more                                         | 3-8 hours              |  |  |  |
| Nimo5008               | AS | Handball player                 | ○         |           | Feb-22      |             |             | Thirties | Male | 183         | 96               | 28.7        | 3 hours or more                                         | 3-8 hours              |  |  |  |
| Nimo5010               | AS | Handball player                 | ○         |           | Nov-21      |             |             | Twenties | Male | 193         | 93               | 25.0        | 30 min - 3 hours                                        | 3-8 hours              |  |  |  |
| Nimo5011               | AS | Handball player                 | ○         | ○         | Nov-21      | May-22      | Oct-22      | Thirties | Male | 177         | 86               | 27.6        | 3 hours or more                                         | 3-8 hours              |  |  |  |
| Nimo5012               | AS | Handball player                 | ○         |           | Nov-21      |             |             | Thirties | Male | 185         | 87               | 25.4        | 30 min - 3 hours                                        | 3-8 hours              |  |  |  |
| Nimo5013               | AS | Handball player                 | ○         |           | Feb-22      |             |             | Twenties | Male | 179         | 82               | 25.6        | 30 min - 3 hours                                        | 3-8 hours              |  |  |  |
| Nimo5016               | AS | Handball player                 | ○         | ○         | Mar-22      | May-22      | Jul-22      | Twenties | Male | 183         | 89               | 26.3        | 30 min - 3 hours                                        | 3-8 hours              |  |  |  |
| Nimo5018               | AS | Handball player                 | ○         |           | Nov-21      |             |             | Twenties | Male | 178         | 81               | 25.6        | 30 min - 3 hours                                        | Less than 3 hours      |  |  |  |
| Nimo5019               | AS | Handball player                 | ○         |           | Nov-21      |             |             | Twenties | Male | 185         | 88               | 25.7        | 30 min - 3 hours                                        | 3-8 hours              |  |  |  |
| Nimo5020               | AS | Handball player                 | ○         |           | Feb-22      |             |             | Twenties | Male | 192         | 99               | 26.9        | 30 min - 3 hours                                        | Less than 3 hours      |  |  |  |
| Nimo5022               | AS | Handball player                 | ○         |           | Nov-21      |             |             | Twenties | Male | 175         | 78               | 25.3        | 30 min - 3 hours                                        | 3-8 hours              |  |  |  |
| Nimo5009               | NS | Team's staff                    | ○         | ○         | Mar-22      | May-22      | Sep-22      | Thirties | Male | 167         | 69               | 24.7        | Less than 30 min                                        | 3-8 hours              |  |  |  |
| Nimo5015               | NS | Team's staff                    | ○         |           | Nov-21      |             |             | Thirties | Male | 186         | 88               | 25.4        | 30 min - 3 hours                                        | 3-8 hours              |  |  |  |
| Nimo5017               | NS | Subject not related to the team | ○         | ○         | Dec-21      | Jun-22      | Jul-22      | Thirties | Male | 189         | 88               | 24.6        | Less than 30 min                                        | Less than 3 hours      |  |  |  |
| Nimo5023               | NS | Subject not related to the team | ○         | ○         | Feb-22      | May-22      | Nov-22      | Twenties | Male | 175         | 62               | 20.2        | 30 min - 3 hours                                        | 3-8 hours              |  |  |  |
| Nimo5027               | NS | Subject not related to the team | ○         | ○         | Mar-22      | May-22      | Aug-22      | Twenties | Male | 168         | 74               | 26.2        | 30 min - 3 hours                                        | 3-8 hours              |  |  |  |
| Nimo5029               | NS | Subject not related to the team | ○         | ○         | Jan-22      | May-22      | Sep-22      | Twenties | Male | 175         | 65               | 21.2        | Less than 30 min                                        | 8 hours or more        |  |  |  |
| Nimo5031               | NS | Subject not related to the team | ○         | ○         | Mar-22      | May-22      | Sep-22      | Twenties | Male | 173         | 59               | 19.7        | 30 min - 3 hours                                        | 3-8 hours              |  |  |  |
| Nimo5032               | NS | Subject not related to the team | ○         | ○         | Feb-22      | Apr-22      | Sep-22      | Thirties | Male | 172         | 64               | 21.5        | Less than 30 min                                        | 8 hours or more        |  |  |  |
| Nimo5034               | NS | Subject not related to the team | ○         | ○         | Jan-22      | Jun-22      | Nov-22      | Thirties | Male | 189         | 75               | 21.0        | Less than 30 min                                        | 8 hours or more        |  |  |  |
| Nimo5035               | NS | Subject not related to the team | ○         | ○         | Feb-22      | Apr-22      | Oct-22      | Thirties | Male | 172         | 62               | 21.0        | Less than 30 min                                        | 8 hours or more        |  |  |  |

\*Abbreviations: Athletic subjects (AS); Non-athletic subjects (NS); term 1 (T1); term 2 (T2); term 3 (T3).

**Supplemental Table S2. Individual data regarding alpha-diversity**

| ID       | Group | Time of stool sampling | Dataset 1 | Dataset 2 | faith pd | shannon entropy | chao1 | pielou evenness | observed features |
|----------|-------|------------------------|-----------|-----------|----------|-----------------|-------|-----------------|-------------------|
| Nimo5001 | AS    | T1                     | ○         |           | 15.6     | 5.23            | 83    | 0.83            | 78                |
| Nimo5002 | AS    | T1                     | ○         | ○         | 19.6     | 5.68            | 96    | 0.87            | 92                |
| Nimo5002 | AS    | T2                     |           | ○         | 13.4     | 5.11            | 50    | 0.91            | 50                |
| Nimo5002 | AS    | T3                     |           | ○         | 17.3     | 5.32            | 86    | 0.84            | 81                |
| Nimo5003 | AS    | T1                     | ○         |           | 16.8     | 5.15            | 91    | 0.80            | 84                |
| Nimo5004 | AS    | T1                     | ○         | ○         | 16.4     | 5.10            | 67    | 0.84            | 66                |
| Nimo5004 | AS    | T2                     |           | ○         | 15.1     | 5.01            | 68    | 0.83            | 67                |
| Nimo5004 | AS    | T3                     |           | ○         | 17.9     | 5.57            | 102   | 0.85            | 94                |
| Nimo5005 | AS    | T1                     | ○         | ○         | 18.9     | 5.36            | 93    | 0.83            | 90                |
| Nimo5005 | AS    | T2                     |           | ○         | 15.8     | 4.95            | 54    | 0.86            | 53                |
| Nimo5005 | AS    | T3                     |           | ○         | 18.8     | 5.44            | 91    | 0.84            | 90                |
| Nimo5006 | AS    | T1                     | ○         |           | 14.3     | 4.82            | 64    | 0.81            | 61                |
| Nimo5007 | AS    | T1                     | ○         |           | 15.7     | 5.18            | 87    | 0.82            | 82                |
| Nimo5008 | AS    | T1                     | ○         |           | 18.3     | 5.39            | 100   | 0.82            | 96                |
| Nimo5010 | AS    | T1                     | ○         |           | 14.3     | 5.11            | 77    | 0.82            | 74                |
| Nimo5011 | AS    | T1                     | ○         | ○         | 20.3     | 6.02            | 115   | 0.88            | 113               |
| Nimo5011 | AS    | T2                     |           | ○         | 16.5     | 5.09            | 69    | 0.84            | 68                |
| Nimo5011 | AS    | T3                     |           | ○         | 19.7     | 5.82            | 110   | 0.86            | 106               |
| Nimo5012 | AS    | T1                     | ○         |           | 16.4     | 5.45            | 97    | 0.84            | 90                |
| Nimo5013 | AS    | T1                     | ○         |           | 13.8     | 5.20            | 68    | 0.85            | 68                |
| Nimo5016 | AS    | T1                     | ○         | ○         | 16.3     | 5.23            | 85    | 0.83            | 80                |
| Nimo5016 | AS    | T2                     |           | ○         | 14.4     | 4.82            | 55    | 0.84            | 54                |
| Nimo5016 | AS    | T3                     |           | ○         | 17.5     | 5.55            | 90    | 0.86            | 88                |
| Nimo5018 | AS    | T1                     | ○         |           | 15.1     | 4.75            | 75    | 0.77            | 71                |
| Nimo5019 | AS    | T1                     | ○         |           | 13.3     | 4.79            | 57    | 0.83            | 56                |
| Nimo5020 | AS    | T1                     | ○         |           | 15.9     | 5.08            | 79    | 0.81            | 76                |
| Nimo5022 | AS    | T1                     | ○         |           | 19.5     | 5.78            | 109   | 0.86            | 103               |
| Nimo5009 | NS    | T1                     | ○         | ○         | 14.5     | 3.81            | 45    | 0.69            | 45                |
| Nimo5009 | NS    | T2                     |           | ○         | 12.5     | 3.53            | 37    | 0.69            | 35                |
| Nimo5009 | NS    | T3                     |           | ○         | 14.5     | 4.00            | 52    | 0.70            | 51                |
| Nimo5015 | NS    | T1                     | ○         |           | 21.3     | 5.76            | 102   | 0.87            | 99                |
| Nimo5017 | NS    | T1                     | ○         | ○         | 18.6     | 5.46            | 84    | 0.86            | 81                |
| Nimo5017 | NS    | T2                     |           | ○         | 16.6     | 5.39            | 94    | 0.84            | 87                |
| Nimo5017 | NS    | T3                     |           | ○         | 14.6     | 5.14            | 67    | 0.85            | 66                |
| Nimo5023 | NS    | T1                     | ○         | ○         | 12.9     | 4.30            | 43    | 0.79            | 43                |
| Nimo5023 | NS    | T2                     |           | ○         | 13.7     | 4.43            | 48    | 0.79            | 48                |
| Nimo5023 | NS    | T3                     |           | ○         | 13.2     | 4.59            | 50    | 0.82            | 49                |
| Nimo5027 | NS    | T1                     | ○         | ○         | 11.8     | 4.28            | 42    | 0.80            | 41                |
| Nimo5027 | NS    | T2                     |           | ○         | 14.1     | 4.61            | 54    | 0.80            | 53                |
| Nimo5027 | NS    | T3                     |           | ○         | 12.9     | 4.48            | 50    | 0.80            | 49                |
| Nimo5029 | NS    | T1                     | ○         | ○         | 18.0     | 5.04            | 76    | 0.82            | 70                |
| Nimo5029 | NS    | T2                     |           | ○         | 15.5     | 4.96            | 57    | 0.85            | 57                |
| Nimo5029 | NS    | T3                     |           | ○         | 19.3     | 5.20            | 91    | 0.81            | 86                |
| Nimo5031 | NS    | T1                     | ○         | ○         | 14.3     | 4.65            | 58    | 0.80            | 57                |
| Nimo5031 | NS    | T2                     |           | ○         | 12.7     | 4.43            | 46    | 0.80            | 46                |
| Nimo5031 | NS    | T3                     |           | ○         | 14.8     | 4.64            | 66    | 0.77            | 66                |
| Nimo5032 | NS    | T1                     | ○         | ○         | 16.9     | 5.17            | 76    | 0.83            | 75                |
| Nimo5032 | NS    | T2                     |           | ○         | 14.8     | 5.04            | 53    | 0.88            | 53                |
| Nimo5032 | NS    | T3                     |           | ○         | 15.5     | 4.31            | 63    | 0.73            | 59                |
| Nimo5034 | NS    | T1                     | ○         | ○         | 15.4     | 4.83            | 65    | 0.80            | 64                |
| Nimo5034 | NS    | T2                     |           | ○         | 12.3     | 4.05            | 48    | 0.73            | 46                |
| Nimo5034 | NS    | T3                     |           | ○         | 12.2     | 4.23            | 42    | 0.80            | 39                |
| Nimo5035 | NS    | T1                     | ○         | ○         | 15.5     | 4.93            | 72    | 0.81            | 69                |
| Nimo5035 | NS    | T2                     |           | ○         | 14.2     | 4.82            | 52    | 0.85            | 52                |
| Nimo5035 | NS    | T3                     |           | ○         | 15.1     | 4.88            | 74    | 0.79            | 71                |

\*Abbreviations: Athletic subjects (AS); Non-athletic subjects (NS); term 1 (T1); term 2 (T2); term 3 (T3).

# Supplemental Table S3. Individual data regarding relative abundance at the genus level

| Taxonomic Group | Succ004 |  |  |  | Succ005 |  |  |  | Succ006 |  |  |  | Succ007 |  |  |  | Succ008 |  |  |  | Succ009 |  |  |  | Succ010 |  |  |  | Succ011 |  |  |  | Succ012 |  |  |  | Succ013 |  |  |  | Succ014 |  |  |  | Succ015 |  |  |  | Succ016 |  |  |  | Succ017 |  |  |  | Succ018 |  |  |  | Succ019 |  |  |  | Succ020 |  |  |  | Succ021 |  |  |  | Succ022 |  |  |  | Succ023 |  |  |  | Succ024 |  |  |  | Succ025 |  |  |  | Succ026 |  |  |  | Succ027 |  |  |  | Succ028 |  |  |  | Succ029 |  |  |  | Succ030 |  |  |  | Succ031 |  |  |  | Succ032 |  |  |  | Succ033 |  |  |  | Succ034 |  |  |  | Succ035 |  |  |  | Succ036 |  |  |  | Succ037 |  |  |  | Succ038 |  |  |  | Succ039 |  |  |  | Succ040 |  |  |  | Succ041 |  |  |  | Succ042 |  |  |  | Succ043 |  |  |  | Succ044 |  |  |  | Succ045 |  |  |  | Succ046 |  |  |  | Succ047 |  |  |  | Succ048 |  |  |  | Succ049 |  |  |  | Succ050 |  |  |  | Succ051 |  |  |  | Succ052 |  |  |  | Succ053 |  |  |  | Succ054 |  |  |  | Succ055 |  |  |  | Succ056 |  |  |  | Succ057 |  |  |  | Succ058 |  |  |  | Succ059 |  |  |  | Succ060 |  |  |  | Succ061 |  |  |  | Succ062 |  |  |  | Succ063 |  |  |  | Succ064 |  |  |  | Succ065 |  |  |  | Succ066 |  |  |  | Succ067 |  |  |  | Succ068 |  |  |  | Succ069 |  |  |  | Succ070 |  |  |  | Succ071 |  |  |  | Succ072 |  |  |  | Succ073 |  |  |  | Succ074 |  |  |  | Succ075 |  |  |  | Succ076 |  |  |  | Succ077 |  |  |  | Succ078 |  |  |  | Succ079 |  |  |  | Succ080 |  |  |  | Succ081 |  |  |  | Succ082 |  |  |  | Succ083 |  |  |  | Succ084 |  |  |  | Succ085 |  |  |  | Succ086 |  |  |  | Succ087 |  |  |  | Succ088 |  |  |  | Succ089 |  |  |  | Succ090 |  |  |  | Succ091 |  |  |  | Succ092 |  |  |  | Succ093 |  |  |  | Succ094 |  |  |  | Succ095 |  |  |  | Succ096 |  |  |  | Succ097 |  |  |  | Succ098 |  |  |  | Succ099 |  |  |  | Succ100 |  |  |  | Succ101 |  |  |  | Succ102 |  |  |  | Succ103 |  |  |  | Succ104 |  |  |  | Succ105 |  |  |  | Succ106 |  |  |  | Succ107 |  |  |  | Succ108 |  |  |  | Succ109 |  |  |  | Succ110 |  |  |  | Succ111 |  |  |  | Succ112 |  |  |  | Succ113 |  |  |  | Succ114 |  |  |  | Succ115 |  |  |  | Succ116 |  |  |  | Succ117 |  |  |  | Succ118 |  |  |  | Succ119 |  |  |  | Succ120 |  |  |  | Succ121 |  |  |  | Succ122 |  |  |  | Succ123 |  |  |  | Succ124 |  |  |  | Succ125 |  |  |  | Succ126 |  |  |  | Succ127 |  |  |  | Succ128 |  |  |  | Succ129 |  |  |  | Succ130 |  |  |  | Succ131 |  |  |  | Succ132 |  |  |  | Succ133 |  |  |  | Succ134 |  |  |  | Succ135 |  |  |  | Succ136 |  |  |  | Succ137 |  |  |  | Succ138 |  |  |  | Succ139 |  |  |  | Succ140 |  |  |  | Succ141 |  |  |  | Succ142 |  |  |  | Succ143 |  |  |  | Succ144 |  |  |  | Succ145 |  |  |  | Succ146 |  |  |  | Succ147 |  |  |  | Succ148 |  |  |  | Succ149 |  |  |  | Succ150 |  |  |  | Succ151 |  |  |  | Succ152 |  |  |  | Succ153 |  |  |  | Succ154 |  |  |  | Succ155 |  |  |  | Succ156 |  |  |  | Succ157 |  |  |  | Succ158 |  |  |  | Succ159 |  |  |  | Succ160 |  |  |  | Succ161 |  |  |  | Succ162 |  |  |  | Succ163 |  |  |  | Succ164 |  |  |  | Succ165 |  |  |  | Succ166 |  |  |  | Succ167 |  |  |  | Succ168 |  |  |  | Succ169 |  |  |  | Succ170 |  |  |  | Succ171 |  |  |  | Succ172 |  |  |  | Succ173 |  |  |  | Succ174 |  |  |  | Succ175 |  |  |  | Succ176 |  |  |  | Succ177 |  |  |  | Succ178 |  |  |  | Succ179 |  |  |  | Succ180 |  |  |  | Succ181 |  |  |  | Succ182 |  |  |  | Succ183 |  |  |  | Succ184 |  |  |  | Succ185 |  |  |  | Succ186 |  |  |  | Succ187 |  |  |  | Succ188 |  |  |  | Succ189 |  |  |  | Succ190 |  |  |  | Succ191 |  |  |  | Succ192 |  |  |  | Succ193 |  |  |  | Succ194 |  |  |  | Succ195 |  |  |  | Succ196 |  |  |  | Succ197 |  |  |  | Succ198 |  |  |  | Succ199 |  |  |  | Succ200 |  |  |  | Succ201 |  |  |  | Succ202 |  |  |  | Succ203 |  |  |  | Succ204 |  |  |  | Succ205 |  |  |  | Succ206 |  |  |  | Succ207 |  |  |  | Succ208 |  |  |  | Succ209 |  |  |  | Succ210 |  |  |  | Succ211 |  |  |  | Succ212 |  |  |  | Succ213 |  |  |  | Succ214 |  |  |  | Succ215 |  |  |  | Succ216 |  |  |  | Succ217 |  |  |  | Succ218 |  |  |  | Succ219 |  |  |  | Succ220 |  |  |  | Succ221 |  |  |  | Succ222 |  |  |  | Succ223 |  |  |  | Succ224 |  |  |  | Succ225 |  |  |  | Succ226 |  |  |  | Succ227 |  |  |  | Succ228 |  |  |  | Succ229 |  |  |  | Succ230 |  |  |  | Succ231 |  |  |  | Succ232 |  |  |  | Succ233 |  |  |  | Succ234 |  |  |  | Succ235 |  |  |  | Succ236 |  |  |  | Succ237 |  |  |  | Succ238 |  |  |  | Succ239 |  |  |  | Succ240 |  |  |  | Succ241 |  |  |  | Succ242 |  |  |  | Succ243 |  |  |  | Succ244 |  |  |  | Succ245 |  |  |  | Succ246 |  |  |  | Succ247 |  |  |  | Succ248 |  |  |  | Succ249 |  |  |  | Succ250 |  |  |  | Succ251 |  |  |  | Succ252 |  |  |  | Succ253 |  |  |  | Succ254 |  |  |  | Succ255 |  |  |  | Succ256 |  |  |  | Succ257 |  |  |  | Succ258 |  |  |  | Succ259 |  |  |  | Succ260 |  |  |  | Succ261 |  |  |  | Succ262 |  |  |  | Succ263 |  |  |  | Succ264 |  |  |  | Succ265 |  |  |  | Succ266 |  |  |  | Succ267 |  |  |  | Succ268 |  |  |  | Succ269 |  |  |  | Succ270 |  |  |  | Succ271 |  |  |  | Succ272 |  |  |  | Succ273 |  |  |  | Succ274 |  |  |  | Succ275 |  |  |  | Succ276 |  |  |  | Succ277 |  |  |  | Succ278 |  |  |  | Succ279 |  |  |  | Succ280 |  |  |  | Succ281 |  |  |  | Succ282 |  |  |  |  |
|-----------------|---------|--|--|--|---------|--|--|--|---------|--|--|--|---------|--|--|--|---------|--|--|--|---------|--|--|--|---------|--|--|--|---------|--|--|--|---------|--|--|--|---------|--|--|--|---------|--|--|--|---------|--|--|--|---------|--|--|--|---------|--|--|--|---------|--|--|--|---------|--|--|--|---------|--|--|--|---------|--|--|--|---------|--|--|--|---------|--|--|--|---------|--|--|--|---------|--|--|--|---------|--|--|--|---------|--|--|--|---------|--|--|--|---------|--|--|--|---------|--|--|--|---------|--|--|--|---------|--|--|--|---------|--|--|--|---------|--|--|--|---------|--|--|--|---------|--|--|--|---------|--|--|--|---------|--|--|--|---------|--|--|--|---------|--|--|--|---------|--|--|--|---------|--|--|--|---------|--|--|--|---------|--|--|--|---------|--|--|--|---------|--|--|--|---------|--|--|--|---------|--|--|--|---------|--|--|--|---------|--|--|--|---------|--|--|--|---------|--|--|--|---------|--|--|--|---------|--|--|--|---------|--|--|--|---------|--|--|--|---------|--|--|--|---------|--|--|--|---------|--|--|--|---------|--|--|--|---------|--|--|--|---------|--|--|--|---------|--|--|--|---------|--|--|--|---------|--|--|--|---------|--|--|--|---------|--|--|--|---------|--|--|--|---------|--|--|--|---------|--|--|--|---------|--|--|--|---------|--|--|--|---------|--|--|--|---------|--|--|--|---------|--|--|--|---------|--|--|--|---------|--|--|--|---------|--|--|--|---------|--|--|--|---------|--|--|--|---------|--|--|--|---------|--|--|--|---------|--|--|--|---------|--|--|--|---------|--|--|--|---------|--|--|--|---------|--|--|--|---------|--|--|--|---------|--|--|--|---------|--|--|--|---------|--|--|--|---------|--|--|--|---------|--|--|--|---------|--|--|--|---------|--|--|--|---------|--|--|--|---------|--|--|--|---------|--|--|--|---------|--|--|--|---------|--|--|--|---------|--|--|--|---------|--|--|--|---------|--|--|--|---------|--|--|--|---------|--|--|--|---------|--|--|--|---------|--|--|--|---------|--|--|--|---------|--|--|--|---------|--|--|--|---------|--|--|--|---------|--|--|--|---------|--|--|--|---------|--|--|--|---------|--|--|--|---------|--|--|--|---------|--|--|--|---------|--|--|--|---------|--|--|--|---------|--|--|--|---------|--|--|--|---------|--|--|--|---------|--|--|--|---------|--|--|--|---------|--|--|--|---------|--|--|--|---------|--|--|--|---------|--|--|--|---------|--|--|--|---------|--|--|--|---------|--|--|--|---------|--|--|--|---------|--|--|--|---------|--|--|--|---------|--|--|--|---------|--|--|--|---------|--|--|--|---------|--|--|--|---------|--|--|--|---------|--|--|--|---------|--|--|--|---------|--|--|--|---------|--|--|--|---------|--|--|--|---------|--|--|--|---------|--|--|--|---------|--|--|--|---------|--|--|--|---------|--|--|--|---------|--|--|--|---------|--|--|--|---------|--|--|--|---------|--|--|--|---------|--|--|--|---------|--|--|--|---------|--|--|--|---------|--|--|--|---------|--|--|--|---------|--|--|--|---------|--|--|--|---------|--|--|--|---------|--|--|--|---------|--|--|--|---------|--|--|--|---------|--|--|--|---------|--|--|--|---------|--|--|--|---------|--|--|--|---------|--|--|--|---------|--|--|--|---------|--|--|--|---------|--|--|--|---------|--|--|--|---------|--|--|--|---------|--|--|--|---------|--|--|--|---------|--|--|--|---------|--|--|--|---------|--|--|--|---------|--|--|--|---------|--|--|--|---------|--|--|--|---------|--|--|--|---------|--|--|--|---------|--|--|--|---------|--|--|--|---------|--|--|--|---------|--|--|--|---------|--|--|--|---------|--|--|--|---------|--|--|--|---------|--|--|--|---------|--|--|--|---------|--|--|--|---------|--|--|--|---------|--|--|--|---------|--|--|--|---------|--|--|--|---------|--|--|--|---------|--|--|--|---------|--|--|--|---------|--|--|--|---------|--|--|--|---------|--|--|--|---------|--|--|--|---------|--|--|--|---------|--|--|--|---------|--|--|--|---------|--|--|--|---------|--|--|--|---------|--|--|--|---------|--|--|--|---------|--|--|--|---------|--|--|--|---------|--|--|--|---------|--|--|--|---------|--|--|--|---------|--|--|--|---------|--|--|--|---------|--|--|--|---------|--|--|--|---------|--|--|--|---------|--|--|--|---------|--|--|--|---------|--|--|--|---------|--|--|--|---------|--|--|--|---------|--|--|--|---------|--|--|--|---------|--|--|--|---------|--|--|--|---------|--|--|--|---------|--|--|--|---------|--|--|--|---------|--|--|--|---------|--|--|--|---------|--|--|--|---------|--|--|--|---------|--|--|--|---------|--|--|--|---------|--|--|--|---------|--|--|--|---------|--|--|--|---------|--|--|--|---------|--|--|--|---------|--|--|--|---------|--|--|--|---------|--|--|--|---------|--|--|--|---------|--|--|--|---------|--|--|--|---------|--|--|--|---------|--|--|--|---------|--|--|--|---------|--|--|--|---------|--|--|--|---------|--|--|--|---------|--|--|--|---------|--|--|--|---------|--|--|--|---------|--|--|--|---------|--|--|--|---------|--|--|--|---------|--|--|--|---------|--|--|--|---------|--|--|--|---------|--|--|--|---------|--|--|--|---------|--|--|--|---------|--|--|--|---------|--|--|--|---------|--|--|--|---------|--|--|--|---------|--|--|--|---------|--|--|--|---------|--|--|--|---------|--|--|--|---------|--|--|--|---------|--|--|--|---------|--|--|--|---------|--|--|--|---------|--|--|--|--|
|-----------------|---------|--|--|--|---------|--|--|--|---------|--|--|--|---------|--|--|--|---------|--|--|--|---------|--|--|--|---------|--|--|--|---------|--|--|--|---------|--|--|--|---------|--|--|--|---------|--|--|--|---------|--|--|--|---------|--|--|--|---------|--|--|--|---------|--|--|--|---------|--|--|--|---------|--|--|--|---------|--|--|--|---------|--|--|--|---------|--|--|--|---------|--|--|--|---------|--|--|--|---------|--|--|--|---------|--|--|--|---------|--|--|--|---------|--|--|--|---------|--|--|--|---------|--|--|--|---------|--|--|--|---------|--|--|--|---------|--|--|--|---------|--|--|--|---------|--|--|--|---------|--|--|--|---------|--|--|--|---------|--|--|--|---------|--|--|--|---------|--|--|--|---------|--|--|--|---------|--|--|--|---------|--|--|--|---------|--|--|--|---------|--|--|--|---------|--|--|--|---------|--|--|--|---------|--|--|--|---------|--|--|--|---------|--|--|--|---------|--|--|--|---------|--|--|--|---------|--|--|--|---------|--|--|--|---------|--|--|--|---------|--|--|--|---------|--|--|--|---------|--|--|--|---------|--|--|--|---------|--|--|--|---------|--|--|--|---------|--|--|--|---------|--|--|--|---------|--|--|--|---------|--|--|--|---------|--|--|--|---------|--|--|--|---------|--|--|--|---------|--|--|--|---------|--|--|--|---------|--|--|--|---------|--|--|--|---------|--|--|--|---------|--|--|--|---------|--|--|--|---------|--|--|--|---------|--|--|--|---------|--|--|--|---------|--|--|--|---------|--|--|--|---------|--|--|--|---------|--|--|--|---------|--|--|--|---------|--|--|--|---------|--|--|--|---------|--|--|--|---------|--|--|--|---------|--|--|--|---------|--|--|--|---------|--|--|--|---------|--|--|--|---------|--|--|--|---------|--|--|--|---------|--|--|--|---------|--|--|--|---------|--|--|--|---------|--|--|--|---------|--|--|--|---------|--|--|--|---------|--|--|--|---------|--|--|--|---------|--|--|--|---------|--|--|--|---------|--|--|--|---------|--|--|--|---------|--|--|--|---------|--|--|--|---------|--|--|--|---------|--|--|--|---------|--|--|--|---------|--|--|--|---------|--|--|--|---------|--|--|--|---------|--|--|--|---------|--|--|--|---------|--|--|--|---------|--|--|--|---------|--|--|--|---------|--|--|--|---------|--|--|--|---------|--|--|--|---------|--|--|--|---------|--|--|--|---------|--|--|--|---------|--|--|--|---------|--|--|--|---------|--|--|--|---------|--|--|--|---------|--|--|--|---------|--|--|--|---------|--|--|--|---------|--|--|--|---------|--|--|--|---------|--|--|--|---------|--|--|--|---------|--|--|--|---------|--|--|--|---------|--|--|--|---------|--|--|--|---------|--|--|--|---------|--|--|--|---------|--|--|--|---------|--|--|--|---------|--|--|--|---------|--|--|--|---------|--|--|--|---------|--|--|--|---------|--|--|--|---------|--|--|--|---------|--|--|--|---------|--|--|--|---------|--|--|--|---------|--|--|--|---------|--|--|--|---------|--|--|--|---------|--|--|--|---------|--|--|--|---------|--|--|--|---------|--|--|--|---------|--|--|--|---------|--|--|--|---------|--|--|--|---------|--|--|--|---------|--|--|--|---------|--|--|--|---------|--|--|--|---------|--|--|--|---------|--|--|--|---------|--|--|--|---------|--|--|--|---------|--|--|--|---------|--|--|--|---------|--|--|--|---------|--|--|--|---------|--|--|--|---------|--|--|--|---------|--|--|--|---------|--|--|--|---------|--|--|--|---------|--|--|--|---------|--|--|--|---------|--|--|--|---------|--|--|--|---------|--|--|--|---------|--|--|--|---------|--|--|--|---------|--|--|--|---------|--|--|--|---------|--|--|--|---------|--|--|--|---------|--|--|--|---------|--|--|--|---------|--|--|--|---------|--|--|--|---------|--|--|--|---------|--|--|--|---------|--|--|--|---------|--|--|--|---------|--|--|--|---------|--|--|--|---------|--|--|--|---------|--|--|--|---------|--|--|--|---------|--|--|--|---------|--|--|--|---------|--|--|--|---------|--|--|--|---------|--|--|--|---------|--|--|--|---------|--|--|--|---------|--|--|--|---------|--|--|--|---------|--|--|--|---------|--|--|--|---------|--|--|--|---------|--|--|--|---------|--|--|--|---------|--|--|--|---------|--|--|--|---------|--|--|--|---------|--|--|--|---------|--|--|--|---------|--|--|--|---------|--|--|--|---------|--|--|--|---------|--|--|--|---------|--|--|--|---------|--|--|--|---------|--|--|--|---------|--|--|--|---------|--|--|--|---------|--|--|--|---------|--|--|--|---------|--|--|--|---------|--|--|--|---------|--|--|--|---------|--|--|--|---------|--|--|--|---------|--|--|--|---------|--|--|--|---------|--|--|--|---------|--|--|--|---------|--|--|--|---------|--|--|--|---------|--|--|--|---------|--|--|--|---------|--|--|--|---------|--|--|--|---------|--|--|--|---------|--|--|--|---------|--|--|--|---------|--|--|--|---------|--|--|--|---------|--|--|--|---------|--|--|--|---------|--|--|--|---------|--|--|--|---------|--|--|--|---------|--|--|--|---------|--|--|--|---------|--|--|--|---------|--|--|--|---------|--|--|--|---------|--|--|--|---------|--|--|--|---------|--|--|--|---------|--|--|--|---------|--|--|--|---------|--|--|--|---------|--|--|--|---------|--|--|--|---------|--|--|--|---------|--|--|--|---------|--|--|--|---------|--|--|--|---------|--|--|--|---------|--|--|--|---------|--|--|--|---------|--|--|--|---------|--|--|--|---------|--|--|--|--|

**Supplemental Table S4. The relative abundance at the genus level (>1%) for dataset 1**

|                                     | Relative abundance |         |       |         |          | Detection ratio |        |        |          |          |
|-------------------------------------|--------------------|---------|-------|---------|----------|-----------------|--------|--------|----------|----------|
|                                     | AS                 |         | NS    |         | p-values | q-values        | AS     | NS     | p-values | q-values |
|                                     | Mean               | ± SD    | Mean  | ± SD    |          |                 |        |        |          |          |
| <i>Phocaeicola A 858004</i>         | 0.131              | ± 0.054 | 0.134 | ± 0.091 | 0.863    | 0.980           | 100.0% | 90.0%  | 0.370    | 0.986    |
| <i>Faecalibacterium</i>             | 0.145              | ± 0.054 | 0.070 | ± 0.052 | 0.003 ** | 0.024 ‡         | 94.1%  | 70.0%  | 0.128    | 0.812    |
| <i>Blautia A 141781</i>             | 0.079              | ± 0.021 | 0.083 | ± 0.029 | 0.941    | 0.980           | 100.0% | 100.0% | 1.000    | 1.000    |
| <i>Bacteroides H</i>                | 0.061              | ± 0.044 | 0.116 | ± 0.100 | 0.223    | 0.471           | 100.0% | 100.0% | 1.000    | 1.000    |
| <i>Bifidobacterium 388775</i>       | 0.057              | ± 0.055 | 0.096 | ± 0.071 | 0.141    | 0.383           | 100.0% | 90.0%  | 0.370    | 0.986    |
| <i>Prevotella</i>                   | 0.053              | ± 0.104 | 0.031 | ± 0.057 | 0.933    | 0.980           | 41.2%  | 40.0%  | 1.000    | 1.000    |
| <i>Gemmiger A 73129</i>             | 0.028              | ± 0.021 | 0.040 | ± 0.047 | 0.633    | 0.802           | 94.1%  | 80.0%  | 0.535    | 1.000    |
| <i>Ruminococcus E</i>               | 0.015              | ± 0.019 | 0.060 | ± 0.064 | 0.164    | 0.390           | 52.9%  | 60.0%  | 1.000    | 1.000    |
| <i>Agathobacter 164117</i>          | 0.042              | ± 0.041 | 0.017 | ± 0.023 | 0.113    | 0.358           | 70.6%  | 40.0%  | 0.224    | 0.986    |
| <i>Fusicatenibacter</i>             | 0.032              | ± 0.019 | 0.017 | ± 0.014 | 0.033 *  | 0.207           | 88.2%  | 90.0%  | 1.000    | 1.000    |
| <i>Anaerostipes</i>                 | 0.016              | ± 0.009 | 0.018 | ± 0.036 | 0.047 *  | 0.225           | 100.0% | 80.0%  | 0.128    | 0.812    |
| <i>Ruminococcus B</i>               | 0.010              | ± 0.013 | 0.022 | ± 0.032 | 0.410    | 0.708           | 58.8%  | 70.0%  | 0.692    | 1.000    |
| <i>Faecalibacillus</i>              | 0.015              | ± 0.014 | 0.017 | ± 0.017 | 0.980    | 0.980           | 76.5%  | 60.0%  | 0.415    | 0.986    |
| <i>Parabacteroides B 862066</i>     | 0.012              | ± 0.008 | 0.016 | ± 0.010 | 0.366    | 0.695           | 94.1%  | 90.0%  | 1.000    | 1.000    |
| <i>Fusobacterium A</i>              | 0.016              | ± 0.041 | 0.003 | ± 0.005 | 0.580    | 0.787           | 29.4%  | 20.0%  | 0.678    | 1.000    |
| <i>Streptococcus</i>                | 0.018              | ± 0.020 | 0.004 | ± 0.007 | 0.001 ** | 0.024 ‡         | 100.0% | 60.0%  | 0.012 *  | 0.228    |
| <i>Alloprevotella</i>               | 0.022              | ± 0.048 | 0.000 | ± 0.000 | 0.113    | 0.358           | 23.5%  | 0.0%   | 0.264    | 0.986    |
| <i>Dorea A</i>                      | 0.014              | ± 0.010 | 0.012 | ± 0.012 | 0.530    | 0.775           | 88.2%  | 80.0%  | 0.613    | 1.000    |
| Unclassified <i>Lachnospiraceae</i> | 0.008              | ± 0.013 | 0.018 | ± 0.027 | 0.494    | 0.775           | 76.5%  | 70.0%  | 1.000    | 1.000    |

The relative abundance at the genus level (>1%) for dataset 1.

\*Abbreviations: Athletic subjects (AS), Non-athletic subjects (NS), standard deviation (SD).

The p-values and q-values were statistically analyzed using the Mann–Whitney U test and Benjamini–Hochberg procedure, respectively.

\* $p < 0.05$ , \*\* $p < 0.001$ , ‡ $q < 0.05$

## Supplemental table S5. DDBJ accession numbers corresponding to 16S rRNA gene sequence data

| ID       | Group | Time of<br>stool sampling | Dataset<br>1 | Dataset<br>2 | BioProject ID | BioSample ID |
|----------|-------|---------------------------|--------------|--------------|---------------|--------------|
| Nimo5001 | AS    | T1                        | ○            |              | PRJDB17286    | SAMD00729907 |
| Nimo5002 | AS    | T1                        | ○            | ○            | PRJDB17286    | SAMD00729908 |
| Nimo5002 | AS    | T2                        |              | ○            | PRJDB17286    | SAMD00729909 |
| Nimo5002 | AS    | T3                        |              | ○            | PRJDB17286    | SAMD00729910 |
| Nimo5003 | AS    | T1                        | ○            |              | PRJDB17286    | SAMD00729911 |
| Nimo5004 | AS    | T1                        | ○            | ○            | PRJDB17286    | SAMD00729912 |
| Nimo5004 | AS    | T2                        |              | ○            | PRJDB17286    | SAMD00729913 |
| Nimo5004 | AS    | T3                        |              | ○            | PRJDB17286    | SAMD00729914 |
| Nimo5005 | AS    | T1                        | ○            | ○            | PRJDB17286    | SAMD00729915 |
| Nimo5005 | AS    | T2                        |              | ○            | PRJDB17286    | SAMD00729916 |
| Nimo5005 | AS    | T3                        |              | ○            | PRJDB17286    | SAMD00729917 |
| Nimo5006 | AS    | T1                        | ○            |              | PRJDB17286    | SAMD00729918 |
| Nimo5007 | AS    | T1                        | ○            |              | PRJDB17286    | SAMD00729919 |
| Nimo5008 | AS    | T1                        | ○            |              | PRJDB17286    | SAMD00729920 |
| Nimo5010 | AS    | T1                        | ○            |              | PRJDB17286    | SAMD00729924 |
| Nimo5011 | AS    | T1                        | ○            | ○            | PRJDB17286    | SAMD00729925 |
| Nimo5011 | AS    | T2                        |              | ○            | PRJDB17286    | SAMD00729926 |
| Nimo5011 | AS    | T3                        |              | ○            | PRJDB17286    | SAMD00729927 |
| Nimo5012 | AS    | T1                        | ○            |              | PRJDB17286    | SAMD00729928 |
| Nimo5013 | AS    | T1                        | ○            |              | PRJDB17286    | SAMD00729929 |
| Nimo5016 | AS    | T1                        | ○            | ○            | PRJDB17286    | SAMD00729931 |
| Nimo5016 | AS    | T2                        |              | ○            | PRJDB17286    | SAMD00729932 |
| Nimo5016 | AS    | T3                        |              | ○            | PRJDB17286    | SAMD00729933 |
| Nimo5018 | AS    | T1                        | ○            |              | PRJDB17286    | SAMD00729937 |
| Nimo5019 | AS    | T1                        | ○            |              | PRJDB17286    | SAMD00729938 |
| Nimo5020 | AS    | T1                        | ○            |              | PRJDB17286    | SAMD00729939 |
| Nimo5022 | AS    | T1                        | ○            |              | PRJDB17286    | SAMD00729940 |
| Nimo5009 | NS    | T1                        | ○            | ○            | PRJDB17286    | SAMD00729921 |
| Nimo5009 | NS    | T2                        |              | ○            | PRJDB17286    | SAMD00729922 |
| Nimo5009 | NS    | T3                        |              | ○            | PRJDB17286    | SAMD00729923 |
| Nimo5015 | NS    | T1                        | ○            |              | PRJDB17286    | SAMD00729930 |
| Nimo5017 | NS    | T1                        | ○            | ○            | PRJDB17286    | SAMD00729934 |
| Nimo5017 | NS    | T2                        |              | ○            | PRJDB17286    | SAMD00729935 |
| Nimo5017 | NS    | T3                        |              | ○            | PRJDB17286    | SAMD00729936 |
| Nimo5023 | NS    | T1                        | ○            | ○            | PRJDB17286    | SAMD00729941 |
| Nimo5023 | NS    | T2                        |              | ○            | PRJDB17286    | SAMD00729942 |
| Nimo5023 | NS    | T3                        |              | ○            | PRJDB17286    | SAMD00729943 |
| Nimo5027 | NS    | T1                        | ○            | ○            | PRJDB17286    | SAMD00729944 |
| Nimo5027 | NS    | T2                        |              | ○            | PRJDB17286    | SAMD00729945 |
| Nimo5027 | NS    | T3                        |              | ○            | PRJDB17286    | SAMD00729946 |
| Nimo5029 | NS    | T1                        | ○            | ○            | PRJDB17286    | SAMD00729947 |
| Nimo5029 | NS    | T2                        |              | ○            | PRJDB17286    | SAMD00729948 |
| Nimo5029 | NS    | T3                        |              | ○            | PRJDB17286    | SAMD00729949 |
| Nimo5031 | NS    | T1                        | ○            | ○            | PRJDB17286    | SAMD00729950 |
| Nimo5031 | NS    | T2                        |              | ○            | PRJDB17286    | SAMD00729951 |
| Nimo5031 | NS    | T3                        |              | ○            | PRJDB17286    | SAMD00729952 |
| Nimo5032 | NS    | T1                        | ○            | ○            | PRJDB17286    | SAMD00729953 |
| Nimo5032 | NS    | T2                        |              | ○            | PRJDB17286    | SAMD00729954 |
| Nimo5032 | NS    | T3                        |              | ○            | PRJDB17286    | SAMD00729955 |
| Nimo5034 | NS    | T1                        | ○            | ○            | PRJDB17286    | SAMD00729956 |
| Nimo5034 | NS    | T2                        |              | ○            | PRJDB17286    | SAMD00729957 |
| Nimo5034 | NS    | T3                        |              | ○            | PRJDB17286    | SAMD00729958 |
| Nimo5035 | NS    | T1                        | ○            | ○            | PRJDB17286    | SAMD00729959 |
| Nimo5035 | NS    | T2                        |              | ○            | PRJDB17286    | SAMD00729960 |
| Nimo5035 | NS    | T3                        |              | ○            | PRJDB17286    | SAMD00729961 |

\*Abbreviations: Athletic subjects (AS); Non-athletic subjects (NS); term 1 (T1); term 2 (T2); term 3 (T3).
